# Supplementary material for: The 125Te Chemical Shift of Diphenyl Ditelluride: Chasing Conformers over a Flat Energy Surface
Source: PubMed Central journal article supplement (PMC6480379; doi:10.3390/molecules24071250), 2019-03-30
Supplement: molecules-24-01250-s001.pdf [file molecules-24-01250-s001.pdf]

# The $^{125}\text{Te}$ chemical shift of diphenyl ditelluride: chasing conformers over a flat energy surface

Marco Bortoli <sup>1</sup>, Marco Dalla Tiezza <sup>1</sup>, Cecilia Muraro <sup>1</sup>, Giacomo Saielli <sup>1,2</sup> and Laura Orian <sup>1,\*</sup>

<sup>1</sup> Dipartimento di Scienze Chimiche, Università degli Studi di Padova, Via Marzolo 1, 35131 Padova, Italy  
[marco.bortoli@studenti.unipd.it](mailto:marco.bortoli@studenti.unipd.it); [marco.dallatiezza@studenti.unipd.it](mailto:marco.dallatiezza@studenti.unipd.it); [cecilia.muraro@studenti.unipd.it](mailto:cecilia.muraro@studenti.unipd.it)

<sup>2</sup> CNR Institute on Membrane Technology, Padova Unit, 35131 Padova, Italy; [giacomo.saielli@unipd.it](mailto:giacomo.saielli@unipd.it)

\* Correspondence: [laura.orian@unipd.it](mailto:laura.orian@unipd.it); Tel.: +39-049-8275140

## Table of contents

|                                                                                                                                                                                                            |   |
|------------------------------------------------------------------------------------------------------------------------------------------------------------------------------------------------------------|---|
| Figure S1 Values of the isotropic shielding constant of $^{125}\text{Te}$ in the isolated $\text{Ph}_2\text{Te}_2$ molecule calculated at different times of the MD simulation. ....                       | 3 |
| Table S1 Comparison between DFT and MM geometries <i>in vacuo</i> . Te-Te distance (R, Å), and relevant dihedrals ( $\Psi$ , $\Phi_{1,2}$ , °).....                                                        | 3 |
| Table S2 Analysis of the $^{125}\text{Te}$ paramagnetic contribution to the shielding constant ( $\sigma_p$ ) of $\text{PhTeH}^{[a]}$ at the maximum imposed elongation of the Te-H bond .....             | 3 |
| Table S4 Analysis of the $^{125}\text{Te}$ paramagnetic contribution to the shielding constant ( $\sigma_p$ ) of $\text{Ph}_2\text{Te}_2^{[a]}$ at the maximum imposed elongation of the Te-Te bond .....  | 4 |
| Table S5 Analysis of the $^{125}\text{Te}$ paramagnetic contribution to the shielding constant ( $\sigma_p$ ) of $\text{Ph}_2\text{Te}_2^{[a]}$ with an imposed $\Psi$ dihedral value of $0^\circ$ .....   | 5 |
| Table S6 Analysis of the $^{125}\text{Te}$ paramagnetic contribution to the shielding constant ( $\sigma_p$ ) of $\text{Ph}_2\text{Te}_2^{[a]}$ with an imposed $\Psi$ dihedral value of $180^\circ$ ..... | 5 |
| Table S7 Coordinates of the optimized conformers of $\text{Ph}_2\text{Te}_2$ . ....                                                                                                                        | 6 |
| Table S8 Coordinates of $\text{Ph}_2\text{Te}_2$ at the maximum elongation of the Te-Te bond.....                                                                                                          | 6 |
| Table S9 Coordinates of $\text{Ph}_2\text{Te}_2$ with a $\Psi$ dihedral value of $0^\circ$ .....                                                                                                           | 6 |
| Table S10 Coordinates of $\text{Ph}_2\text{Te}_2$ with a $\Psi$ dihedral value of $180^\circ$ .....                                                                                                        | 7 |
| Table S11 Coordinates of the optimized structure of $\text{PhTeH}$ .....                                                                                                                                   | 7 |
| Table S12 Coordinates of $\text{PhTeH}$ at the maximum elongation of the Te-H bond. ....                                                                                                                   | 7 |
| Table S13 Coordinates of $\text{PhTeH}$ after rotation of the C-C-Te-H dihedral of $90^\circ$ .....                                                                                                        | 8 |
| Table S14 Coordinates of the reference molecule $\text{Me}_2\text{Te}$ .....                                                                                                                               | 8 |
| Equation S1 AMBER force field used in the MD simulations.....                                                                                                                                              | 9 |

|                                                                                                                                                                                                          |    |
|----------------------------------------------------------------------------------------------------------------------------------------------------------------------------------------------------------|----|
| Table S15 New GAFF parameters for Ph <sub>2</sub> Te <sub>2</sub> molecule. ....                                                                                                                         | 9  |
| Figure S2 Values of <sup>125</sup> Te chemical shift in the isolated Ph <sub>2</sub> Te <sub>2</sub> molecule calculated with and without Spin-Orbit corrections during the rotation of Ψ dihedral. .... | 9  |
| Figure S3 HOMO-1 (left) and HOMO-2 (right) of Ph <sub>2</sub> Te <sub>2</sub> with an imposed Ψ dihedral value of 0 ° .....                                                                              | 10 |
| Figure S4 HOMO-1 orbital of Ph <sub>2</sub> Te <sub>2</sub> with an imposed Ψ dihedral value of 180 ° .....                                                                                              | 10 |

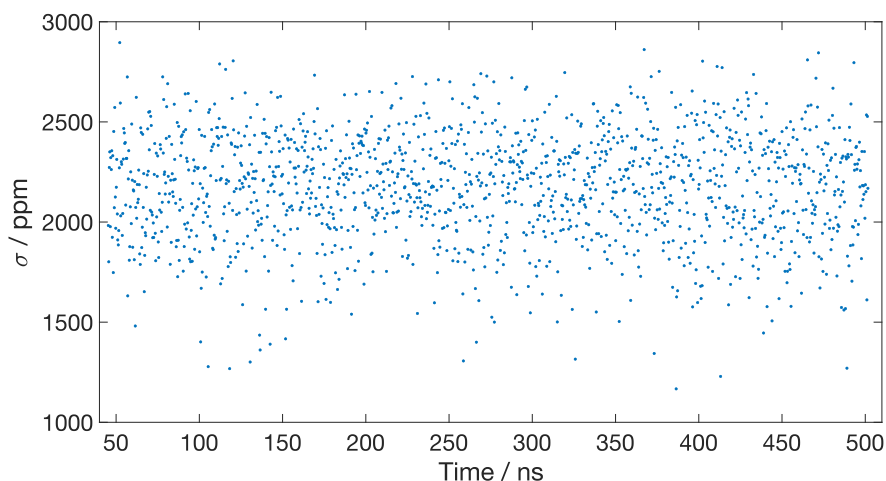

**Figure S1** Values of the isotropic shielding constant of  $^{125}\text{Te}$  in the isolated  $\text{Ph}_2\text{Te}_2$  molecule calculated at different times of the MD simulation. Level of theory COSMO-ZORA-OPBE/QZ4Pae

**Table S1** Comparison between DFT and MM geometries *in vacuo*. Te-Te distance ( $R$ , Å), and relevant dihedrals ( $\Psi$ ,  $\Phi_{1,2}$ , °). Levels of theory: DFT ZORA-OPBE/TZ2P; MM AMBER-ff14SB

|          | DFT  |        | MM   |
|----------|------|--------|------|
|          | Open | Closed |      |
| R        | 2.69 | 2.66   | 2.68 |
| $\Psi$   | -87  | -89    | -82  |
| $\Phi_1$ | 100  | 10     | 16   |
| $\Phi_2$ | 100  | 10     | 16   |

**Table S2** Analysis of the  $^{125}\text{Te}$  paramagnetic contribution to the shielding constant ( $\sigma_p$ ) of  $\text{PhTeH}$  [a] at the maximum imposed elongation of the Te-H bond:  $\sigma_p^{(\text{occ-virt})}$  terms (ppm) and energy difference between the two involved orbitals ( $\Delta\varepsilon$ , eV). Level of theory: ZORA-OPBE/QZ4Pae//ZORA-OPBE/TZ2P

| occ      | virt     | $\sigma_p^{(\text{occ-virt})}$ | $\Delta\varepsilon$ |
|----------|----------|--------------------------------|---------------------|
| HOMO - 7 | LUMO + 9 | -129.6                         | 5.72                |
| HOMO - 4 | LUMO     | -611.6                         | 3.72                |
| HOMO - 3 | LUMO + 3 | -112.0                         | 6.34                |
| HOMO - 1 | LUMO + 3 | -123.0                         | 5.28                |
| HOMO     | LUMO     | -4998.8                        | 1.10                |
|          | LUMO + 2 | -197.0                         | 3.67                |
|          | LUMO + 3 | -838.1                         | 4.17                |

[a] Contributions that are smaller (absolute value) than 100 ppm are not shown.

**Table S3** Analysis of the paramagnetic shielding constant of Te in PhTeH after rotation of the C-C-Te-H dihedral of 90°: <sup>[a]</sup> contribution of the orbital pair to the paramagnetic shielding constant ( $\sigma_p^{(\text{occ-virt})}$ , ppm) and energy difference between the two involved orbitals ( $\Delta\varepsilon^{(\text{occ-virt})}$ , eV)

| Occ      | Virt     | $\sigma_p^{(\text{occ-virt})}$ | $\Delta\varepsilon$ |
|----------|----------|--------------------------------|---------------------|
| HOMO – 3 | LUMO + 2 | -251.0                         | 6.32                |
| HOMO     | LUMO     | -288.4                         | 3.45                |
|          | LUMO + 2 | -774.0                         | 3.98                |
|          | LUMO + 3 | -316.6                         | 4.58                |

**Table S4** Analysis of the <sup>125</sup>Te paramagnetic contribution to the shielding constant ( $\sigma_p$ ) of Ph<sub>2</sub>Te<sub>2</sub> <sup>[a]</sup> at the maximum imposed elongation of the Te-Te bond:  $\sigma_p^{(\text{occ-virt})}$  terms (ppm) and energy difference between the two involved orbitals ( $\Delta\varepsilon$ , eV). Level of theory: ZORA-OPBE/QZ4Pae//ZORA-OPBE/TZ2P.

| occ      | virt     | $\sigma_p^{(\text{occ-virt})}$ [b] | $\Delta\varepsilon$ |
|----------|----------|------------------------------------|---------------------|
| HOMO – 8 | LUMO     | 224.1                              | 4.91                |
|          | LUMO + 5 | 128.4                              | 7.00                |
| HOMO – 7 | LUMO     | -234.0                             | 4.51                |
| HOMO – 6 | LUMO     | -342.7                             | 4.35                |
|          | LUMO + 5 | -168.6                             | 6.45                |
|          | LUMO + 6 | -113.9                             | 6.52                |
| HOMO – 2 | LUMO     | -352.9                             | 3.06                |
|          | LUMO + 5 | -115.0                             | 5.15                |
|          | LUMO + 6 | -138.7                             | 5.23                |
| HOMO – 1 | LUMO     | -670.4                             | 2.14                |
|          | LUMO + 6 | -598.7                             | 4.31                |
| HOMO     | LUMO     | -636.4                             | 2.06                |
|          | LUMO + 5 | -199.3                             | 4.15                |

[a] Contributions that are smaller (absolute value) than 100 ppm are not shown.

**Table S5** Analysis of the  $^{125}\text{Te}$  paramagnetic contribution to the shielding constant ( $\sigma_p$ ) of  $\text{Ph}_2\text{Te}_2$  [a] with an imposed  $\Psi$  dihedral value of  $0^\circ$ :  $\sigma_p^{(\text{occ-virt})}$  terms (ppm) and energy difference between the two involved orbitals ( $\Delta\varepsilon$ , eV). Level of theory: (SO)-ZORA-OPBE/QZ4Pae//ZORA-OPBE/TZ2P

|          |           | Scalar                             |                     | SO                                 |                     |
|----------|-----------|------------------------------------|---------------------|------------------------------------|---------------------|
| occ      | virt      | $\sigma_p^{(\text{occ-virt})}$ [b] | $\Delta\varepsilon$ | $\sigma_p^{(\text{occ-virt})}$ [b] | $\Delta\varepsilon$ |
| HOMO – 8 | LUMO      | 232.8                              | 5.34                | 270.5                              | 5.37                |
| HOMO – 7 | LUMO      | -319.0                             | 4.82                | -233.3                             | 4.86                |
|          | LUMO + 7  | -126.8                             | 7.17                | -179.9                             | 7.22                |
|          | LUMO + 10 | -102.5                             | 7.75                | -172.1                             | 7.80                |
| HOMO – 6 | LUMO + 1  | -132.7                             | 5.68                | -255.3                             | 5.66                |
| HOMO – 2 | LUMO      | -716.8                             | 3.45                | -1193.6                            | 3.46                |
| HOMO – 1 | LUMO      | -698.1                             | 3.07                | -602.3                             | 3.07                |
|          | LUMO + 1  | -355.3                             | 4.19                | -285.7                             | 4.21                |
|          | LUMO + 5  | -104.6                             | 4.83                | -64.0                              | 4.84                |
| HOMO     | LUMO + 7  | -280.1                             | 3.95                | -260.1                             | 3.94                |
|          | LUMO + 10 | -204.5                             | 4.53                | -187.0                             | 4.52                |

[a] Contributions that are smaller (absolute value) than 100 ppm are not shown.

**Table S6** Analysis of the  $^{125}\text{Te}$  paramagnetic contribution to the shielding constant ( $\sigma_p$ ) of  $\text{Ph}_2\text{Te}_2$  [a] with an imposed  $\Psi$  dihedral value of  $180^\circ$ :  $\sigma_p^{(\text{occ-virt})}$  terms (ppm) and energy difference between the two involved orbitals ( $\Delta\varepsilon$ , eV). Level of theory: (SO)-ZORA-OPBE/QZ4Pae//ZORA-OPBE/TZ2P

|          |          | Scalar                             |                     | SO                                 |                     |
|----------|----------|------------------------------------|---------------------|------------------------------------|---------------------|
| occ      | virt     | $\sigma_p^{(\text{occ-virt})}$ [b] | $\Delta\varepsilon$ | $\sigma_p^{(\text{occ-virt})}$ [b] | $\Delta\varepsilon$ |
| HOMO – 7 | LUMO     | -318.7                             | 5.13                | -352.5                             | 5.15                |
|          | LUMO + 1 | -141.9                             | 6.33                | -189.6                             | 6.35                |
| HOMO – 6 | LUMO + 6 | -250.8                             | 6.55                | -247.9                             | 6.55                |
| HOMO – 5 | LUMO     | -110.7                             | 4.06                | -126.6                             | 4.06                |
| HOMO – 1 | LUMO     | -801.7                             | 3.16                | -860.9                             | 3.17                |
|          | LUMO + 1 | -191.1                             | 4.36                | -201.9                             | 4.37                |
|          | LUMO + 5 | -220.0                             | 4.99                | -163.6                             | 5.01                |
| HOMO     | LUMO + 3 | -112.2                             | 2.90                | -109.2                             | 2.89                |
|          | LUMO + 6 | -456.5                             | 3.72                | -424.5                             | 3.72                |
|          | LUMO + 7 | -111.1                             | 4.06                | -103.0                             | 4.04                |

[a] Contributions that are smaller (absolute value) than 100 ppm are not shown.

**Table S7** Coordinates of the optimized conformers of Ph<sub>2</sub>Te<sub>2</sub>. Level of theory ZORA-OPBE/TZ2P

| Open Conformer     |           |           |           | Closed Conformer   |           |           |           |
|--------------------|-----------|-----------|-----------|--------------------|-----------|-----------|-----------|
| E = -5.50273579 Ha |           |           |           | E = -5.50193037 Ha |           |           |           |
| Te                 | -0.904891 | -0.996129 | -2.273711 | Te                 | -0.886663 | -0.991019 | -2.222910 |
| Te                 | 0.904899  | 0.996145  | -2.273755 | Te                 | 0.886776  | 0.991036  | -2.222788 |
| C                  | -0.135427 | -2.273671 | -0.760487 | C                  | -0.126436 | -2.326579 | -0.748450 |
| C                  | 0.874878  | -3.191409 | -1.054436 | C                  | -0.741336 | -3.577755 | -0.671742 |
| C                  | 1.338736  | -4.055191 | -0.067137 | C                  | -0.319375 | -4.500074 | 0.280979  |
| C                  | 0.793460  | -4.013510 | 1.212731  | C                  | 0.715756  | -4.183671 | 1.154910  |
| C                  | -0.217879 | -3.104183 | 1.505320  | C                  | 1.326466  | -2.936461 | 1.071148  |
| C                  | -0.683119 | -2.234021 | 0.523179  | C                  | 0.907651  | -2.005920 | 0.124875  |
| C                  | 0.135449  | 2.273679  | -0.760511 | C                  | 0.126355  | 2.326574  | -0.748420 |
| C                  | 0.683108  | 2.233995  | 0.523168  | C                  | -0.906997 | 2.005434  | 0.125603  |
| C                  | 0.217830  | 3.104119  | 1.505325  | C                  | -1.325928 | 2.935957  | 1.071840  |
| C                  | -0.793509 | 4.013445  | 1.212738  | C                  | -0.716044 | 4.183620  | 1.154894  |
| C                  | -1.338745 | 4.055168  | -0.067145 | C                  | 0.318359  | 4.500499  | 0.280276  |
| C                  | -0.874852 | 3.191422  | -1.054459 | C                  | 0.740409  | 3.578209  | -0.672434 |
| H                  | 1.301416  | -3.231390 | -2.054330 | H                  | -1.548692 | -3.848119 | -1.351720 |
| H                  | 2.128571  | -4.767184 | -0.302343 | H                  | -0.803627 | -5.474145 | 0.333396  |
| H                  | 1.156509  | -4.692327 | 1.982643  | H                  | 1.045876  | -4.907410 | 1.897718  |
| H                  | -0.648880 | -3.067871 | 2.504859  | H                  | 2.138011  | -2.678329 | 1.750286  |
| H                  | -1.470946 | -1.521767 | 0.758769  | H                  | 1.393673  | -1.033913 | 0.065247  |
| H                  | 1.470924  | 1.521732  | 0.758764  | H                  | -1.392377 | 1.033075  | 0.066538  |
| H                  | 0.648795  | 3.067770  | 2.504878  | H                  | -2.136902 | 2.677451  | 1.751519  |
| H                  | -1.156591 | 4.692229  | 1.982663  | H                  | -1.046250 | 4.907342  | 1.897681  |
| H                  | -2.128579 | 4.767163  | -0.302350 | H                  | 0.801945  | 5.474932  | 0.332123  |
| H                  | -1.301366 | 3.231430  | -2.054363 | H                  | 1.547148  | 3.848960  | -1.352988 |

**Table S8** Coordinates of Ph<sub>2</sub>Te<sub>2</sub> at the maximum elongation of the Te-Te bond. Level of theory ZORA-OPBE/TZ2P

|                    |           |           |           |   |           |           |           |
|--------------------|-----------|-----------|-----------|---|-----------|-----------|-----------|
| E = -5.49320682 Ha |           |           |           |   |           |           |           |
| Te                 | -2.615889 | -1.256666 | -0.678084 | C | 0.242791  | 4.154367  | 0.128354  |
| Te                 | -1.505192 | 0.528420  | -2.675537 | C | 1.088811  | 3.143947  | -0.317394 |
| C                  | -0.904266 | -2.399165 | -0.191988 | C | 0.587961  | 2.103421  | -1.094023 |
| C                  | -0.090708 | -2.022898 | 0.880101  | H | -0.314418 | -1.119142 | 1.442290  |
| C                  | 1.008323  | -2.802560 | 1.227005  | H | 1.638806  | -2.502520 | 2.062766  |
| C                  | 1.300978  | -3.959037 | 0.510669  | H | 2.161978  | -4.566751 | 0.783856  |
| C                  | 0.489717  | -4.338191 | -0.554574 | H | 0.713033  | -5.243339 | -1.117377 |
| C                  | -0.610934 | -3.563644 | -0.906226 | H | -1.241965 | -3.863439 | -1.739733 |
| C                  | -0.767426 | 2.072337  | -1.432504 | H | -2.668411 | 3.077204  | -1.252333 |
| C                  | -1.613255 | 3.092356  | -0.989208 | H | -1.773526 | 4.915760  | 0.136446  |
| C                  | -1.107456 | 4.126176  | -0.208344 | H | 0.635968  | 4.966112  | 0.738074  |
|                    |           |           |           | H | 2.146426  | 3.161431  | -0.058094 |
|                    |           |           |           | H | 1.251965  | 1.312228  | -1.434818 |

**Table S9** Coordinates of Ph<sub>2</sub>Te<sub>2</sub> with a  $\Psi$  dihedral value of 0°. Level of theory ZORA-OPBE/TZ2P

E = -5.48611008 Ha

|    |           |           |           |   |           |           |           |
|----|-----------|-----------|-----------|---|-----------|-----------|-----------|
| Te | -2.343364 | -1.741854 | -1.640357 | C | 1.749364  | 2.241909  | -0.722118 |
| Te | -2.053101 | 0.928766  | -2.416997 | C | 0.772688  | 1.681572  | -1.539696 |
| C  | -0.937057 | -1.906984 | -0.076615 | H | 0.730503  | -2.300016 | -1.386267 |
| C  | 0.396890  | -2.213221 | -0.355297 | H | 2.334327  | -2.650931 | 0.463321  |
| C  | 1.295350  | -2.413696 | 0.687219  | H | 1.573990  | -2.481447 | 2.821568  |
| C  | 0.869003  | -2.318690 | 2.008128  | H | -0.799808 | -1.944460 | 3.319211  |
| C  | -0.460150 | -2.018174 | 2.287249  | H | -2.401738 | -1.572560 | 1.470121  |
| C  | -1.363406 | -1.808785 | 1.249733  | H | -1.927390 | 2.110901  | 0.485414  |
| C  | -0.554412 | 1.629406  | -1.106857 | H | -0.182511 | 3.088870  | 1.939695  |
| C  | -0.894318 | 2.140107  | 0.148083  | H | 2.175806  | 3.183783  | 1.167095  |
| C  | 0.088775  | 2.693002  | 0.962184  | H | 2.781283  | 2.282946  | -1.067546 |
| C  | 1.409909  | 2.746192  | 0.528977  | H | 1.040487  | 1.288814  | -2.517595 |

**Table S10** Coordinates of Ph<sub>2</sub>Te<sub>2</sub> with a  $\Psi$  dihedral value of 180°. Level of theory ZORA-OPBE/TZ2P

|                    |           |           |           |   |           |           |           |
|--------------------|-----------|-----------|-----------|---|-----------|-----------|-----------|
| E = -5.48963046 Ha |           |           |           | C | -0.419282 | 3.090909  | -4.370870 |
|                    |           |           |           | C | -1.169860 | 2.326279  | -3.482582 |
| Te                 | -0.735887 | -1.460567 | -1.461132 | H | -0.462238 | -2.405939 | 1.509549  |
| Te                 | -1.860278 | 0.981079  | -0.817193 | H | -1.792157 | -3.765308 | 3.092357  |
| C                  | -1.909146 | -2.556481 | -0.082512 | H | -3.994237 | -4.684281 | 2.401053  |
| C                  | -1.425268 | -2.807696 | 1.203434  | H | -4.857550 | -4.236252 | 0.115264  |
| C                  | -2.175968 | -3.572152 | 2.091778  | H | -3.527044 | -2.881923 | -1.471116 |
| C                  | -3.409182 | -4.086507 | 1.704190  | H | 0.928388  | 2.407107  | -0.805450 |
| C                  | -3.893091 | -3.835853 | 0.424014  | H | 2.258534  | 3.762056  | -2.391617 |
| C                  | -3.147200 | -3.074086 | -0.470460 | H | 1.397463  | 4.205831  | -4.679087 |
| C                  | -0.687175 | 2.077366  | -2.195731 | H | -0.802116 | 3.282201  | -5.372177 |
| C                  | 0.549489  | 2.597512  | -1.806799 | H | -2.131908 | 1.922724  | -3.7894   |
| C                  | 1.295196  | 3.359590  | -2.701174 |   |           |           |           |
| C                  | 0.812533  | 3.607885  | -3.982268 |   |           |           |           |

**Table S11** Coordinates of the optimized structure of PhTeH. Level of theory ZORA-OPBE/TZ2P

|                    |           |           |           |   |           |           |           |
|--------------------|-----------|-----------|-----------|---|-----------|-----------|-----------|
| E = -2.86286441 Ha |           |           |           | C | 0.908771  | -0.960868 | 0.001322  |
|                    |           |           |           | H | -2.229607 | -2.284481 | -0.002445 |
| Te                 | -1.674219 | 0.741083  | -0.000001 | H | -0.932002 | -4.366843 | -0.002313 |
| H                  | -0.367332 | 1.764608  | 0.000011  | H | 1.555907  | -4.302459 | 0.000037  |
| C                  | -0.487001 | -0.997924 | -0.000026 | H | 2.722471  | -2.106015 | 0.002335  |
| C                  | -1.141981 | -2.231845 | -0.001340 | H | 1.439333  | -0.011663 | 0.002394  |
| C                  | -0.407560 | -3.412482 | -0.001284 |   |           |           |           |
| C                  | 0.982975  | -3.377348 | 0.000027  |   |           |           |           |
| C                  | 1.634142  | -2.148105 | 0.001309  |   |           |           |           |

**Table S12** Coordinates of PhTeH at the maximum elongation of the Te-H bond. Level of theory ZORA-OPBE/TZ2P

|                    |           |           |           |   |           |           |           |
|--------------------|-----------|-----------|-----------|---|-----------|-----------|-----------|
| E = -2.77736595 Ha |           |           |           | C | -1.689343 | -3.973380 | -0.586487 |
|                    |           |           |           | C | -0.818012 | -2.914302 | -0.360932 |
| Te                 | 0.000000  | 0.000000  | 0.000000  | H | -3.078228 | -0.366990 | -0.304812 |
| C                  | -1.313406 | -1.608140 | -0.259696 | H | -4.622792 | -2.259014 | -0.710194 |
| C                  | -2.689370 | -1.379277 | -0.386239 | H | -3.736091 | -4.571926 | -0.888786 |
| C                  | -3.554157 | -2.443530 | -0.612896 | H | -1.298282 | -4.986610 | -0.663783 |
| C                  | -3.056231 | -3.739954 | -0.712673 | H | 0.249350  | -3.096721 | -0.260969 |

H 0.000000 0.000000 2.660000

**Table S13** Coordinates of PhTeH after rotation of the C-C-Te-H dihedral of 90°. Level of theory ZORA-OPBE/TZ2P

E = -2.86183405 Ha

|    |           |           |           |
|----|-----------|-----------|-----------|
| C  | 1.634100  | -2.148100 | 0.001300  |
| C  | 0.908800  | -0.960900 | 0.001300  |
| H  | -2.229600 | -2.284500 | -0.002400 |
| H  | -0.932000 | -4.366800 | -0.002300 |
| H  | 1.555900  | -4.302500 | 0.000000  |
| H  | 2.722500  | -2.106000 | 0.002300  |
| H  | 1.439300  | -0.011700 | 0.002400  |
| Te | -1.674200 | 0.741100  | 0.000000  |
| H  | -1.733822 | 0.831688  | -1.656436 |
| C  | -0.487000 | -0.997900 | 0.000000  |
| C  | -1.142000 | -2.231800 | -0.001300 |
| C  | -0.407600 | -3.412500 | -0.001300 |
| C  | 0.983000  | -3.377300 | 0.000000  |

**Table S14** Coordinates of the reference molecule Me<sub>2</sub>Te. Level of theory ZORA-OPBE/TZ2P

E = -1.55519407 Ha

|    |           |           |           |
|----|-----------|-----------|-----------|
| Te | 0.000000  | 0.000000  | 0.000000  |
| C  | 0.000000  | 0.000000  | -2.164359 |
| H  | 0.493166  | 0.899240  | -2.534463 |
| H  | 0.496429  | -0.897632 | -2.534291 |
| H  | -1.045253 | -0.001967 | -2.479153 |
| C  | 2.155252  | 0.000000  | 0.197676  |
| H  | 2.568981  | -0.898284 | -0.261719 |
| H  | 2.568908  | 0.898620  | -0.260950 |
| H  | 2.373355  | -0.000470 | 1.267237  |



**Equation S1** AMBER force field used in the MD simulations

$$V_{AMBER} = \sum_{i < j}^{n'_{atoms}} \frac{q_i q_j}{4\pi\epsilon_0 r_{ij}} + \sum_{i < j}^{n'_{atoms}} 4\epsilon_{ij} \left[ \left( \frac{\sigma_{ij}}{r_{ij}} \right)^{12} - \left( \frac{\sigma_{ij}}{r_{ij}} \right)^6 \right] + \sum_i^{n_{bonds}} b_i (r_i - r_{i,eq})^2 + \sum_i^{n_{angles}} a_i (\theta_i - \theta_{i,eq})^2 + \sum_i^{n_{dihedrals}} \sum_n^{n_{i,max}} \frac{V_{i,n}}{2} [1 + \cos(n\phi_i - \gamma_{i,n})]$$

**Table S15** New GAFF parameters for Ph<sub>2</sub>Te<sub>2</sub> molecule. Bond equilibrium distances ( $r_{eq}$ , Å), bond force constants ( $b$ , kcal mol<sup>-2</sup> Å<sup>-2</sup>), angle equilibrium amplitudes ( $\theta_{eq}$ , °), angle force constants (kcal mol<sup>-2</sup> rad<sup>-2</sup>) and dihedral Fourier term coefficients ( $V_i$ , kcal mol<sup>-1</sup>)

| Bond     |      | Angle         |      | Dihedral <sup>a</sup> |                  |                  |                  |
|----------|------|---------------|------|-----------------------|------------------|------------------|------------------|
| $r_{eq}$ | $b$  | $\theta_{eq}$ | $a$  | $V_1/2$               | $V_2/2$          | $V_3/2$          | $V_4/2$          |
| Te-Te    |      | Te-Te-C       |      | C-Te-Te-C             |                  |                  |                  |
| 2.68     | 56.6 | 103.1         | 45.2 | 1.775<br>(0.0)        | 2.673<br>(0.0)   | 0.691<br>(0.0)   | 0.105<br>(0.0)   |
| Te-C     |      | Te-C-C        |      | Te-Te-C-C             |                  |                  |                  |
| 2.13     | 78.0 | 123.7         | 59.8 | 0.012<br>(180.0)      | 0.198<br>(180.0) | 0.785<br>(180.0) | 0.036<br>(180.0) |
|          |      |               |      | Te-C-C-H              |                  |                  |                  |
|          |      |               |      | 2.235<br>(180.0)      |                  |                  |                  |

<sup>a</sup>  $\gamma$  values for the corresponding term in parentheses in degrees.

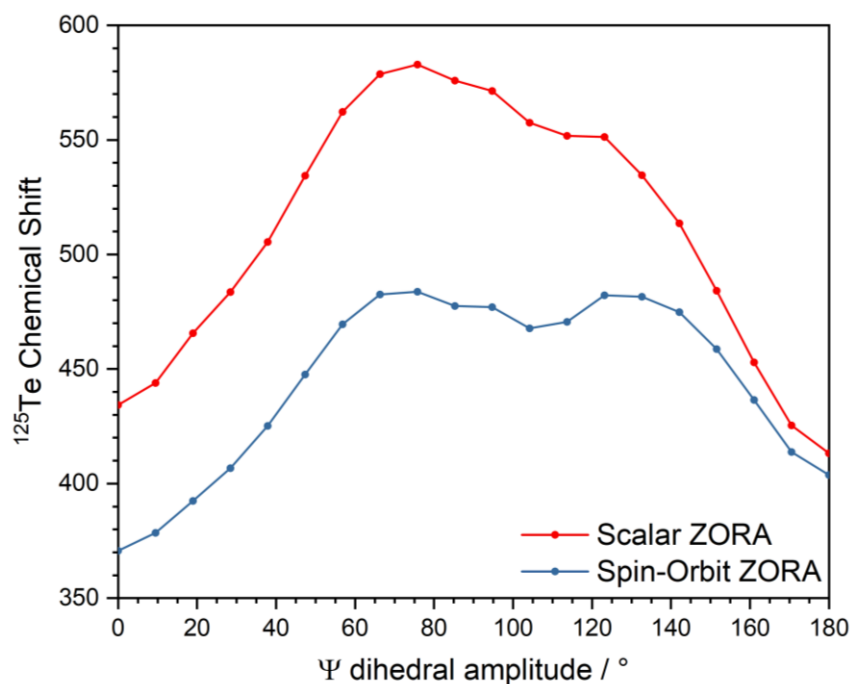

**Figure S2** Values of <sup>125</sup>Te chemical shift in the isolated Ph<sub>2</sub>Te<sub>2</sub> molecule calculated with and without Spin-Orbit corrections during the rotation of  $\Psi$  dihedral. Level of theory COSMO-(SO)-ZORA-OPBE/QZ4Pae

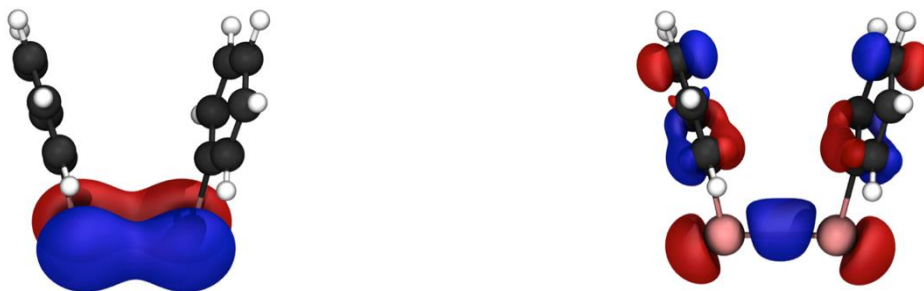

**Figure S3** HOMO-1 (left) and HOMO-2 (right) of Ph<sub>2</sub>Te<sub>2</sub> with an imposed  $\Psi$  dihedral value of 0°. Level of theory ZORA-OPBE/TZ2P

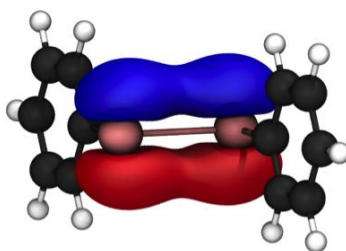

**Figure S4** HOMO-1 orbital of Ph<sub>2</sub>Te<sub>2</sub> with an imposed  $\Psi$  dihedral value of 180°. Level of theory ZORA-OPBE/TZ2P
